# Supplementary material for: First record of Phyllorhiza sp. (Cnidaria: Scyphozoa) in a Chinese coastal aquaculture pond
Source: PeerJ. 2019 Jan 9;7:e6191. doi: 10.7717/peerj.6191 (PMC6330029; doi:10.7717/peerj.6191)
Supplement: Supplemental Information 1 [file peerj-07-6191-s001.xlsx]

## Sheet: Figure 3
Jellyfish Number	Diameter (mm)
1	20
2	17
3	16
4	28
5	23
6	25
7	30
8	30
9	32
10	30
11	36
12	36
13	38
14	38
15	45
16	46
17	43
18	40
19	40
20	48
21	48
22	50
23	55
24	56
25	53
26	65
27	58
28	55
29	53
30	55
31	65
32	60
33	65
34	65
35	60
36	60
37	65
38	75
39	60
40	70
41	60
42	70
43	74
44	74
45	74
46	80
47	85
48	70
49	90
50	80
51	100
52	105
53	105
54	95
55	120
